# Supplementary material for: Use of the Spectroscopy-Based Veggie Meter® to Objectively Assess Fruit and Vegetable Intake in Low-Income Adults
Source: Nutrients. 2021 Jun 30;13(7):2270. doi: 10.3390/nu13072270 (PMC8308249; doi:10.3390/nu13072270)
Supplement: Supplementary file 1 [file nutrients-13-02270-s001.zip › nutrients-1248460-supplementary.pdf]

**Table S1.** Participant characteristics and self-reported fruit and vegetable intake and bivariate relationships with Veggie Meter scores.

| Characteristic                            | Number (%) or Mean $\pm$ SD             | Pearson correlation or Mean VM Score $\pm$ SD |
|-------------------------------------------|-----------------------------------------|-----------------------------------------------|
| Age, mean $\pm$ SD                        | 31.7 $\pm$ 7.2                          | 0.04                                          |
|                                           | Race/ethnicity                          |                                               |
| Hispanic                                  | 217 (73%)                               | 276 $\pm$ 98                                  |
| Non-Hispanic Black/African American       | 37 (13%)                                | 259 $\pm$ 98                                  |
| Non-Hispanic White or other               | 43 (14%)                                | 245 $\pm$ 82                                  |
|                                           | Hispanic origin (Hispanic)***           |                                               |
| Puerto Rican                              | 27 (12%)                                | 210 $\pm$ 61a                                 |
| Ecuadorian                                | 32 (15%)                                | 296 $\pm$ 127b                                |
| Dominican                                 | 73 (34%)                                | 295 $\pm$ 89b                                 |
| Mexican                                   | 30 (14%)                                | 298 $\pm$ 104b                                |
| Other Hispanic                            | 55 (25%)                                | 260 $\pm$ 86a,b                               |
|                                           | Nativity***                             |                                               |
| US-born                                   | 88 (30%)                                | 222 $\pm$ 60                                  |
| Foreign-born                              | 209 (70%)                               | 290 $\pm$ 102                                 |
| Years in US (foreign-born), mean $\pm$ SD | 10.9 $\pm$ 7.6                          | -0.05                                         |
|                                           | Preferred language (foreign-born)       |                                               |
| English                                   | 46 (22%)                                | 291 $\pm$ 98                                  |
| Other than English                        | 163 (78%)                               | 289 $\pm$ 103                                 |
|                                           | Educational attainment                  |                                               |
| Some high school or less                  | 61 (20%)                                | 258 $\pm$ 106                                 |
| High school diploma or equivalent         | 103 (35%)                               | 258 $\pm$ 97                                  |
| More than high school                     | 133 (45%)                               | 284 $\pm$ 90                                  |
|                                           | Pregnancy status                        |                                               |
| Not pregnant                              | 243 (82%)                               | 275 $\pm$ 97                                  |
| Pregnant                                  | 54 (18%)                                | 246 $\pm$ 93                                  |
|                                           | Breastfeeding status*                   |                                               |
| Not breastfeeding                         | 224 (75%)                               | 262 $\pm$ 96                                  |
| Breastfeeding                             | 73 (25%)                                | 293 $\pm$ 93                                  |
|                                           | Car ownership                           |                                               |
| Did not own a reliable car                | 122 (41%)                               | 273 $\pm$ 97                                  |
| Owned a reliable car                      | 175 (59%)                               | 267 $\pm$ 96                                  |
|                                           | Car access                              |                                               |
| Poor                                      | 71 (24%)                                | 283 $\pm$ 85                                  |
| Fair                                      | 41 (14%)                                | 281 $\pm$ 113                                 |
| Good                                      | 37 (12%)                                | 284 $\pm$ 84                                  |
| Very good                                 | 41 (14%)                                | 257 $\pm$ 109                                 |
| Excellent                                 | 107 (36%)                               | 256 $\pm$ 95                                  |
|                                           | Food security status                    |                                               |
| Food insecure                             | 118 (40%)                               | 271 $\pm$ 75                                  |
| Food secure                               | 174 (60%)                               | 268 $\pm$ 108                                 |
|                                           | Smoking status*                         |                                               |
| Nonsmoker                                 | 274 (95%)                               | 272 $\pm$ 96                                  |
| Smoker                                    | 16 (5%)                                 | 208 $\pm$ 67                                  |
|                                           | Past 7-day exposure to secondhand smoke |                                               |
| No                                        | 251 (85%)                               | 273 $\pm$ 98                                  |
| Yes                                       | 44 (15%)                                | 252 $\pm$ 85                                  |

|                               |                                            |            |
|-------------------------------|--------------------------------------------|------------|
|                               | Supplement use                             |            |
| Not taking supplements        | 145 (49%)                                  | 265 ± 86   |
| Taking supplements            | 152 (51%)                                  | 274 ± 105  |
| Body mass index, mean ± SD*** | 29.0 ± 6.9                                 | -0.22      |
|                               | Weight status category**                   |            |
| Underweight and normal weight | 81 (27%)                                   | 285 ± 104a |
| Overweight                    | 105 (36%)                                  | 284 ± 102a |
| Obese                         | 110 (37%)                                  | 244 ± 78b  |
|                               | Meeting physical activity guidelines       |            |
| No                            | 123 (41%)                                  | 275 ± 94   |
| Yes                           | 174 (59%)                                  | 266 ± 98   |
|                               | Self-reported FV intake (cups of FV/day)** |            |
| < 3 cups/day                  | 129 (44%)                                  | 253 ± 82   |
| ≥ 3 cups/day                  | 167 (56%)                                  | 282 ± 105  |

\* $p < 0.05$ ; \*\* $p < 0.01$ ; \*\*\* $p < 0.001$ . Means with differing subscript letters differ significantly ( $p < .05$ ). VM: Veggie Meter; SD: standard deviation; FV: fruits and vegetables. Sample sizes varied due to missing data for some measurements.
